# Supplementary material for: Malaria Burden and Associated Risk Factors in an Area of Pyrethroid-Resistant Vectors in Southern Benin
Source: PubMed Central journal article supplement (PMC9490648; doi:10.4269/ajtmh.22-0190), 2022-07-18

**Supplemental Table S1.** Relationship between malaria prevalence and entomological indicators at cluster level (linear regression)

| Entomological indicators                        | Mean (95% CI)       | Cluster malaria prevalence |            |         |      |
|-------------------------------------------------|---------------------|----------------------------|------------|---------|------|
|                                                 |                     | Coefficient                | 95% CI     | p-value | R2   |
| Indoor human biting rate (b/p/n)                | 27.92 (26.59-29.28) | 0.17                       | 0.03-0.32  | 0.01    | 0.09 |
| Indoor entomological inoculation rate (ib/p/m)  | 21.97 (20.79-23.18) | 0.16                       | 0.07-25.5  | 0.001   | 0.17 |
| Outdoor human biting rate (b/p/n)               | 19.12 (18.02-20.26) | 0.24                       | 0.04-0.45  | 0.02    | 0.08 |
| Outdoor entomological inoculation rate (ib/p/m) | 6.02 (5.41-6.67)    | 0.12                       | -0.19-0.42 | 0.45    | 0.01 |

Abbreviations  
 CI: Confidence interval  
 b/p/n: bite/person/night  
 ib/p/m: infected bites/person/month

**Supplemental Figure S1.** Scatter plot comparing the relationship between malaria prevalence rates and entomological indicators at cluster level.

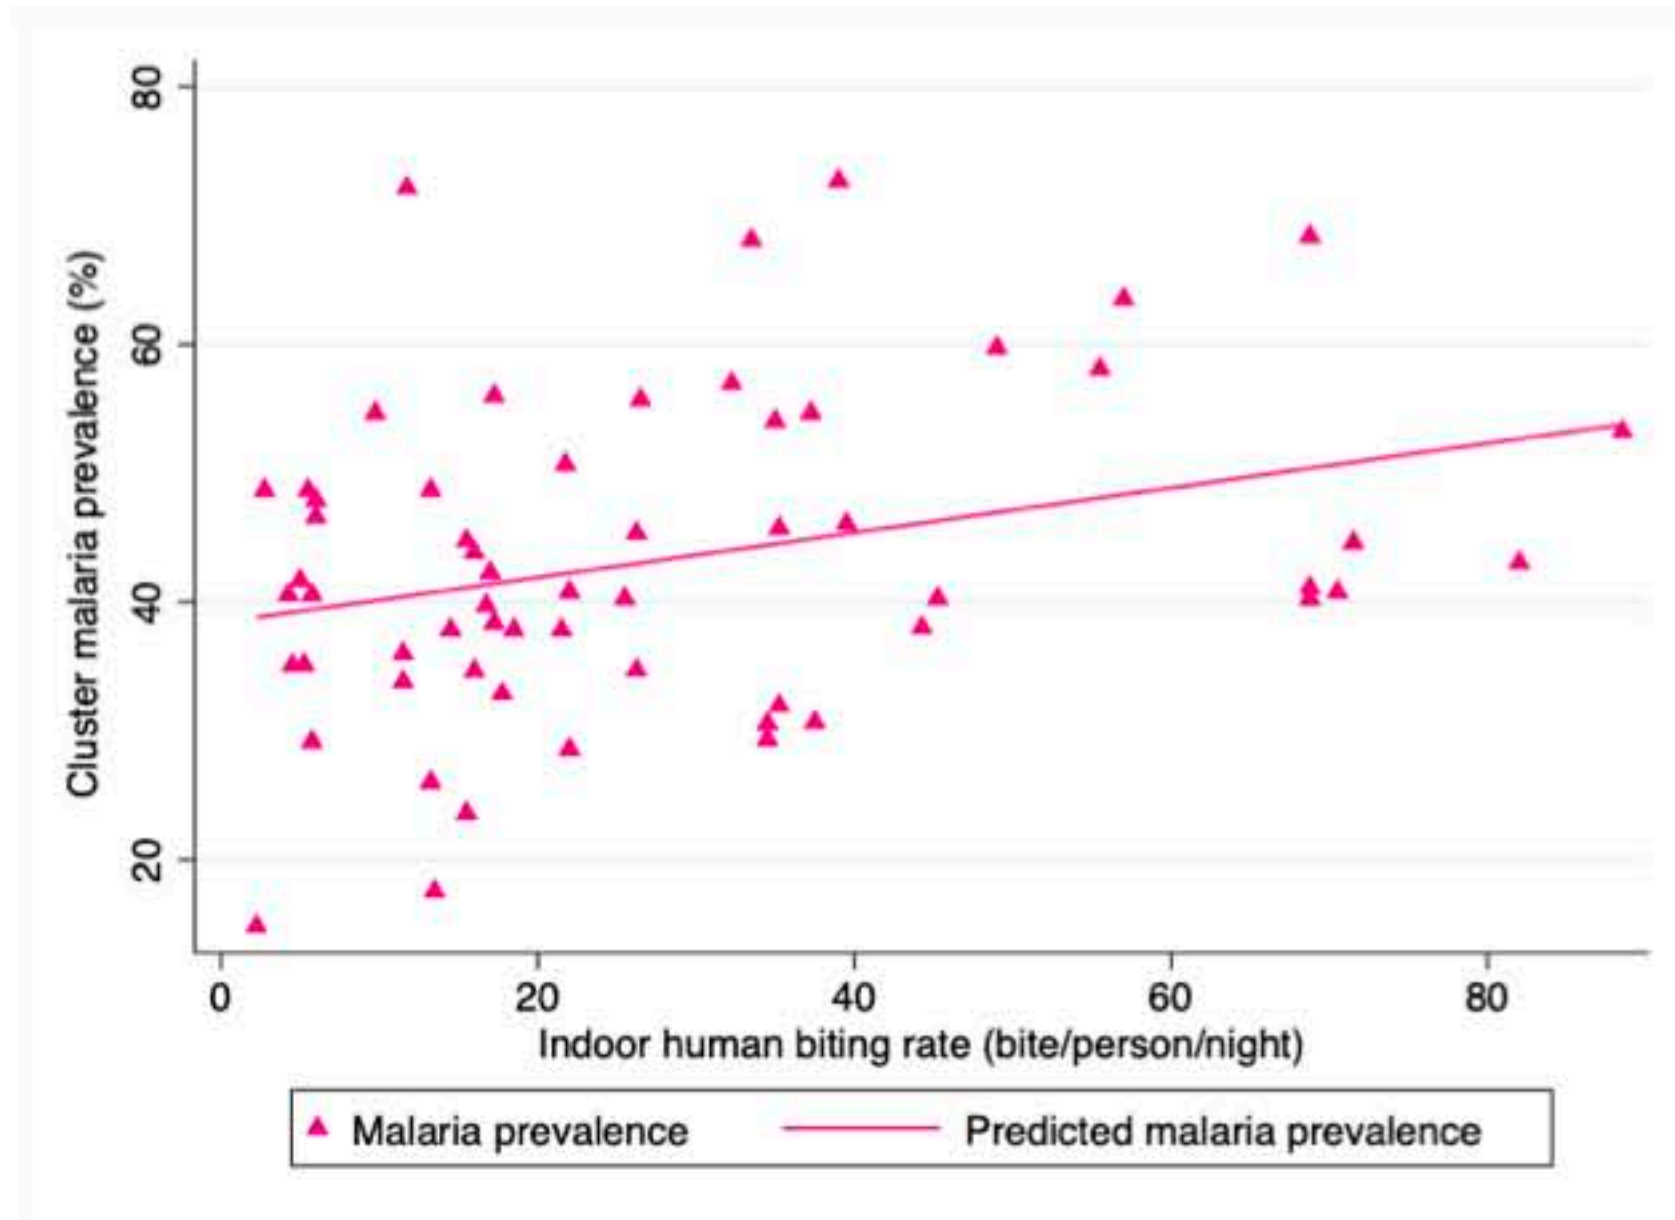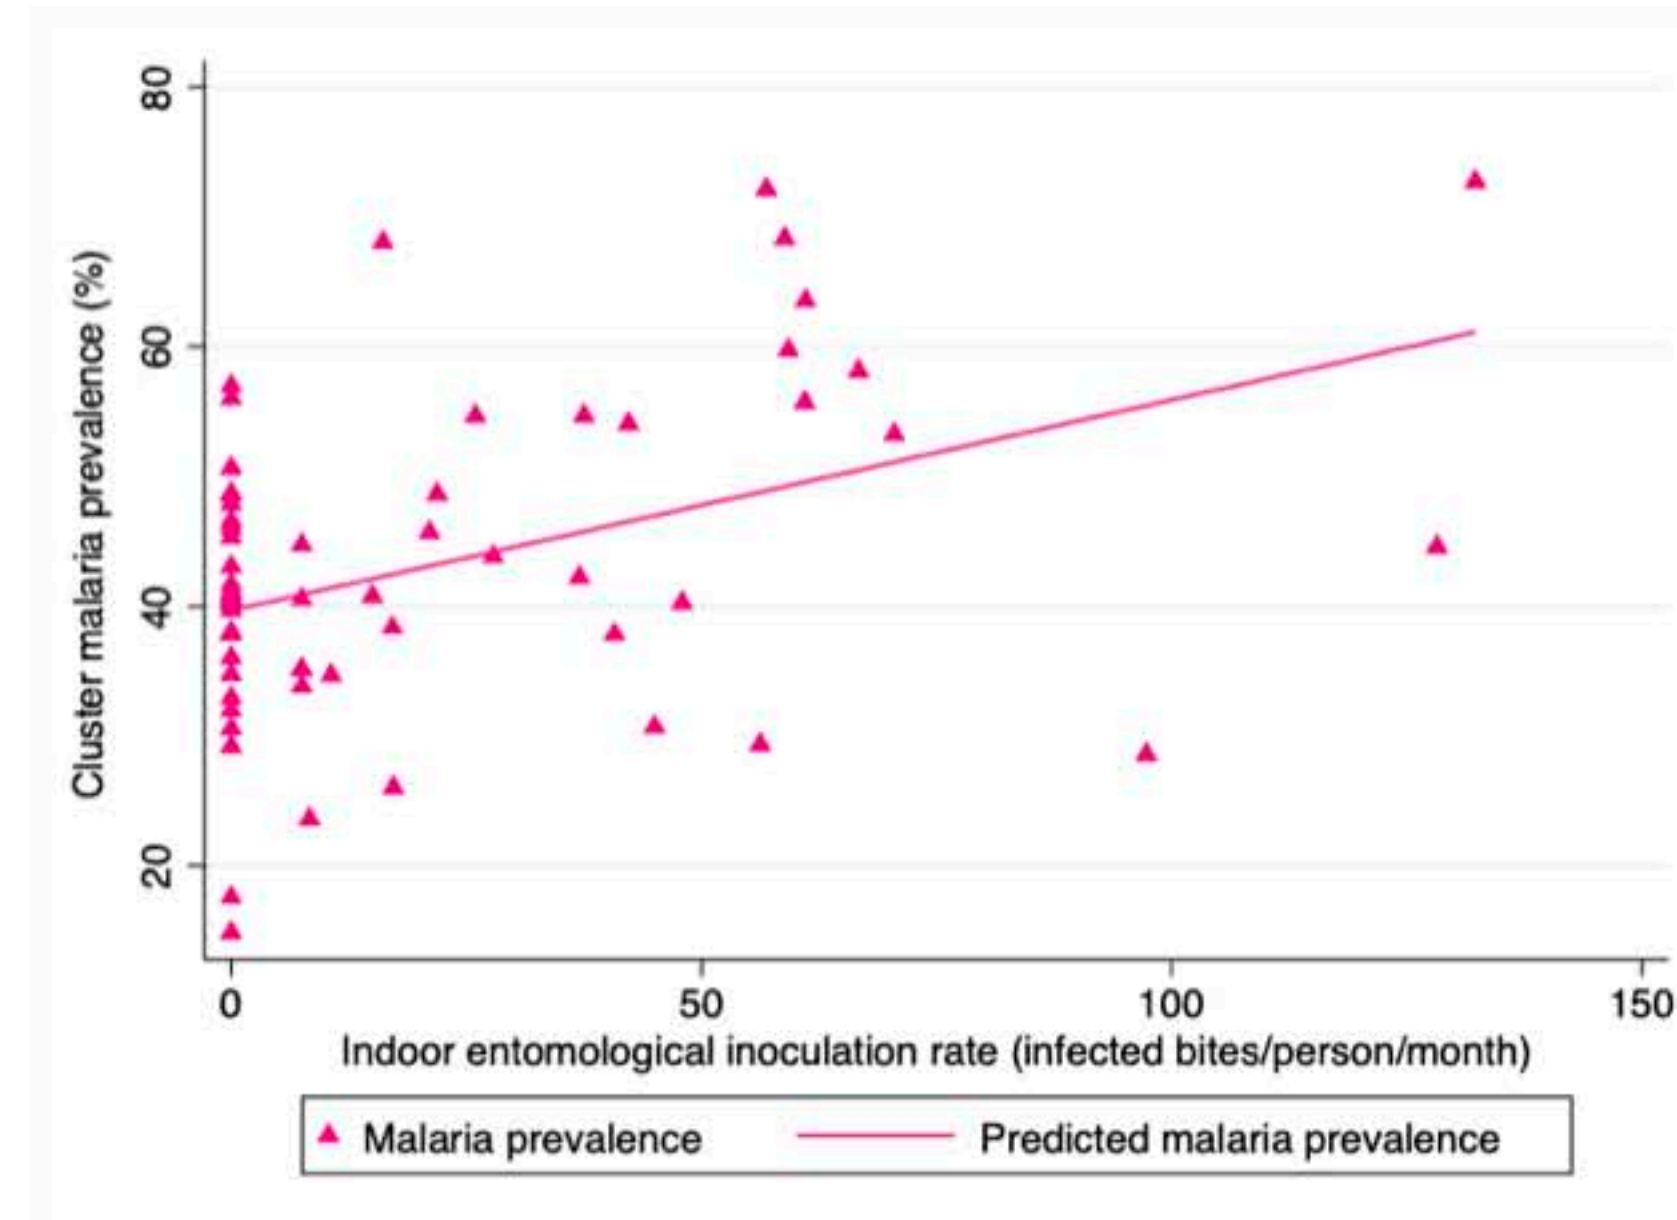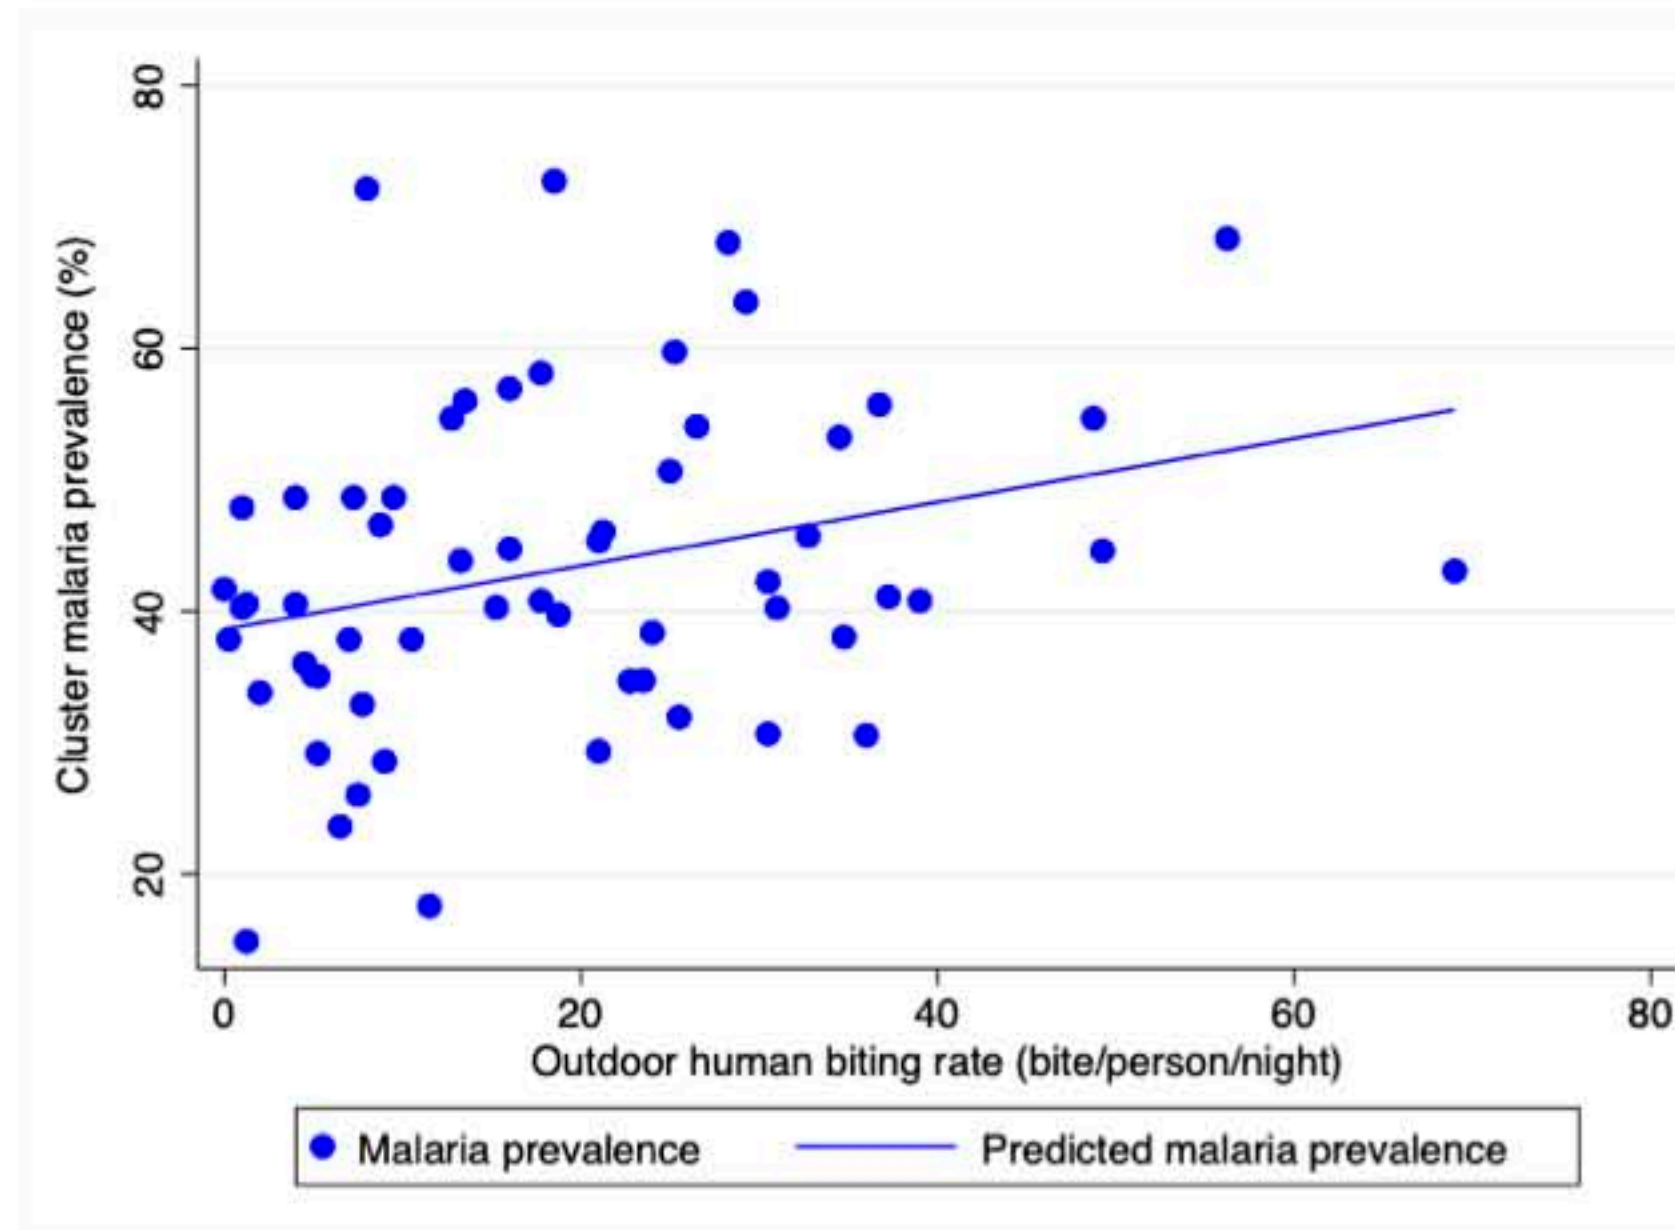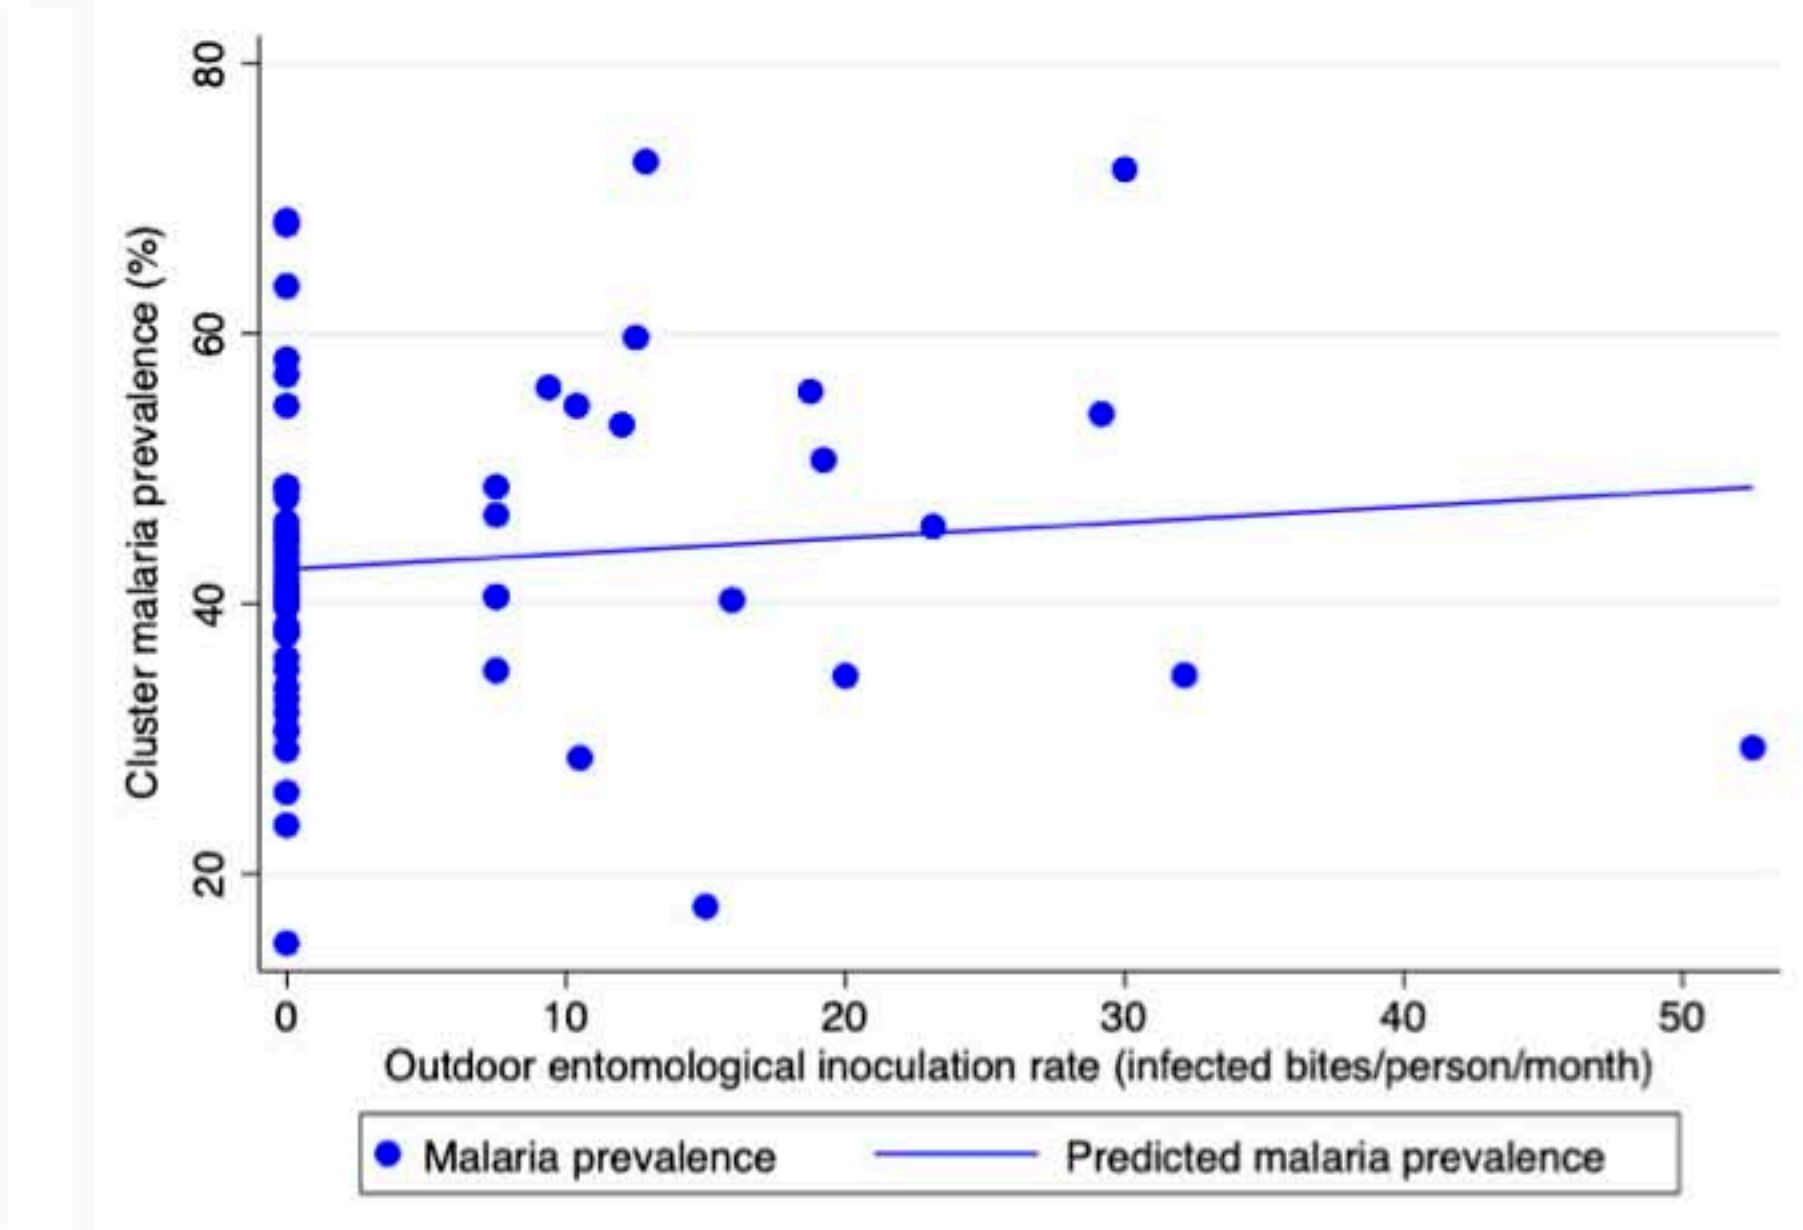

Supplement: tpmd220190.SD1.pdf [file tpmd220190.SD1.pdf]
